# Supplementary material for: Streamlined inactivation, amplification, and Cas13-based detection of SARS-CoV-2
Source: PubMed Central journal article supplement (PMC7680145; doi:10.1038/s41467-020-19097-x), 2020-11-20
Supplement: 41467_2020_19097_MOESM1_ESM.pdf [file 41467_2020_19097_MOESM1_ESM.pdf]

# SUPPLEMENTARY INFORMATION

**Streamlined inactivation, amplification, and Cas13-based detection of SARS-CoV-2**

Arizti-Sanz & Freije *et al.*

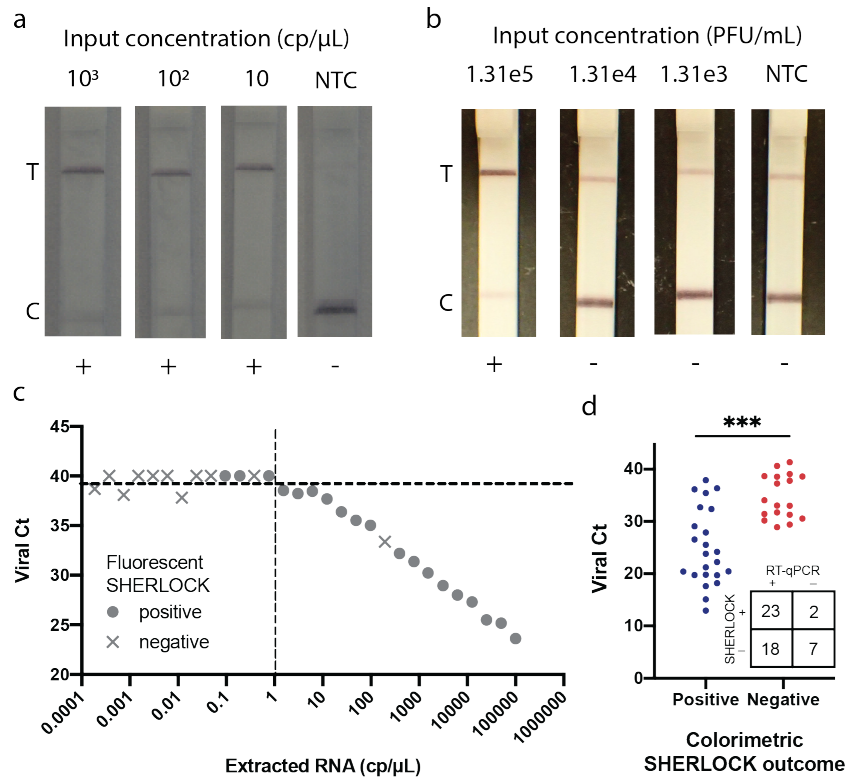

**Supplementary Fig. 1. Additional two-step SHERLOCK testing.**

**a** Colorimetric detection of synthetic DNA using two-step SHERLOCK after 3 h. NTC, non-template control; T, test line; C, control line. **b** Colorimetric detection of HUDSON-treated SARS-CoV-2 viral seedstock using two-step SHERLOCK after 3 h. NTC, non-template control; T, test line; C, control line. **c** Ct values of RT-qPCR for extracted RNA from SARS-CoV-2 seedstock at various concentrations. Symbol indicates the result of our two-step SHERLOCK assay performed side-by-side. The vertical line demarcates 1 cp/μL. The horizontal line demarcates samples with non-quantifiable Ct values (*i.e.*, no amplification), imputed as a Ct of 40. **d** Viral Ct values measured by RT-qPCR for extracted RNA from 41 RT-qPCR positive patient samples grouped by the result of the two-step SHERLOCK assay using a colorimetric, lateral flow-based readout. Inset is the concordance results of all samples tested by colorimetric two-step SHERLOCK and RT-qPCR. The association between viral Ct and two-step SHERLOCK outcome was assessed using a one-sided Wilcoxon rank sum test. **\*\*\***,  $p < 0.0001$ . For **(c and d)** source data are provided as a Source Data file.

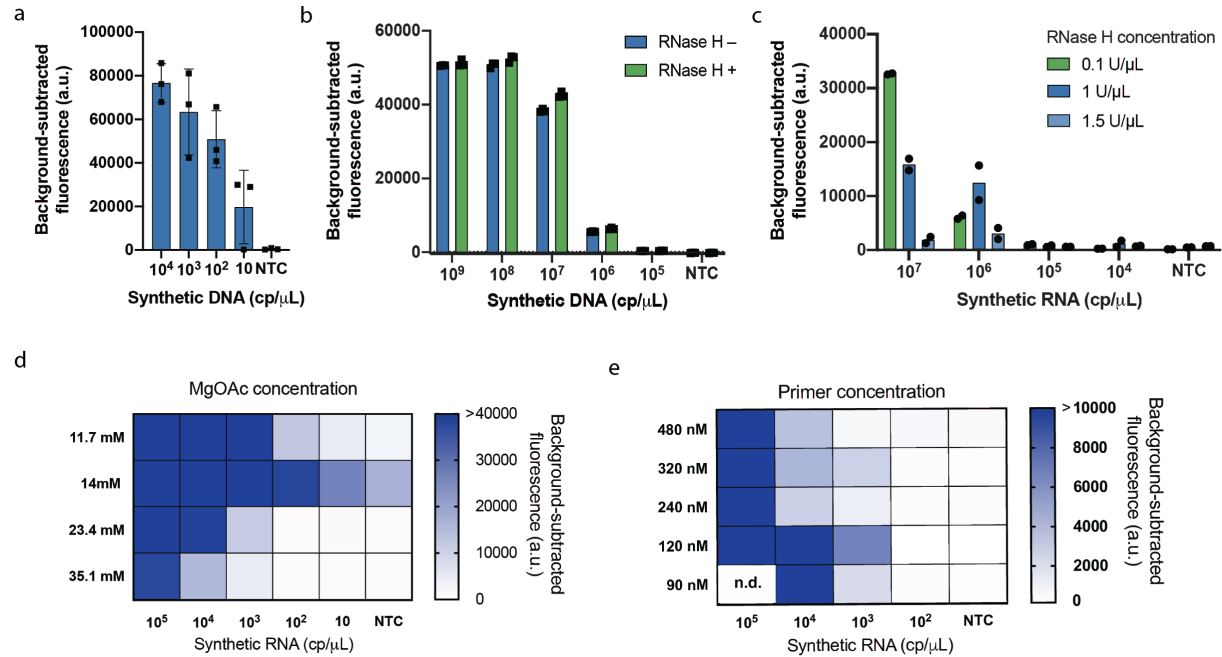

**Supplementary Fig. 2. Optimization of single-step SHERLOCK for improved sensitivity.**

**a** Background-subtracted fluorescence detected after the single-step SHERLOCK reaction was incubated for 3 h with DNA as input. **b** Background-subtracted fluorescence of the Cas13-detection reaction (no RPA enzymes) with 3 h incubation. RNase H+, final concentration of 0.1 U/μL. **c** Background-subtracted fluorescence of the Cas13-detection reaction (no RPA) after 3 h incubation with varying RNase H concentrations. **d** Background-subtracted fluorescence detected after the single-step reaction was incubated for 3 h with varying magnesium concentrations. **e** Background-subtracted fluorescence detected after the single-step reaction was incubated for 3 h with varying RPA primer concentrations. For **a-e**, NTC, non-template controls; error bars, s.d. for 2-3 technical replicates. All listed concentrations refer to concentration within the reaction mixture before addition of the oligonucleotide template. For (**a-c**), Center = mean and error bars = s.d. for 3 technical replicates. For (**a-e**) source data are provided as a Source Data file.

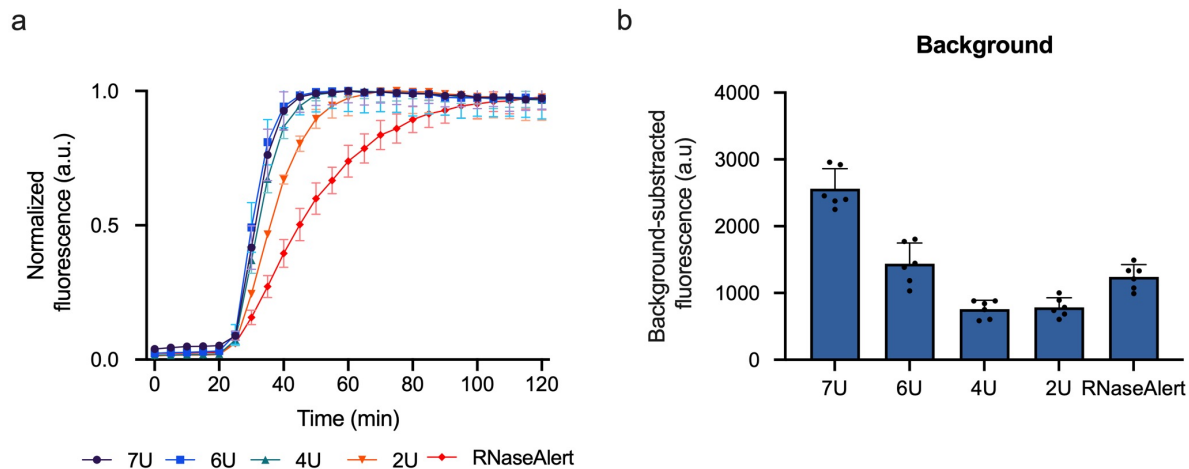

**Supplementary Fig. 3. Optimization of fluorescent reporter.**

**a** Single-step SHERLOCK normalized fluorescence (see Methods for details) over time using quenched poly-uracil FAM reporters of varying lengths or RNaseAlert with RNA input at  $10^4$  cp/ $\mu$ L. **b** Background-subtracted fluorescence of poly-uracil FAM reporters or RNaseAlert in single-step SHERLOCK after 3 h for non-template controls. For (**a** and **b**), Center = mean and error bars = s.d. for 3 (**a**) and 6 (**b**) technical replicates. Source data are provided as a Source Data file.

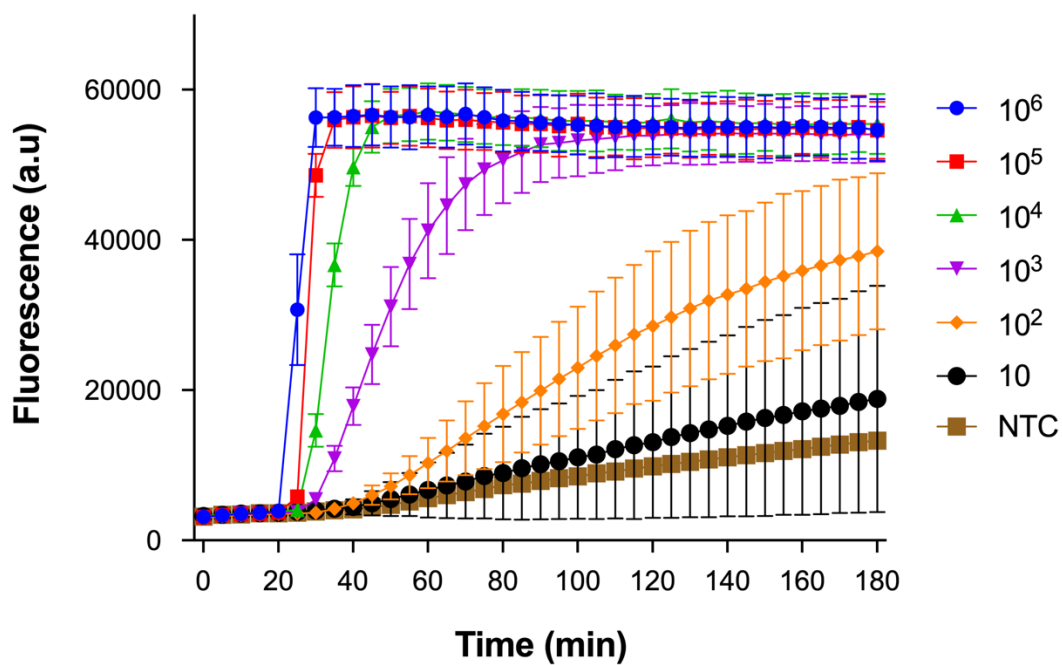

**Supplementary Fig. 4. Single-step SHERLOCK time course.**

Optimized single-step SHERLOCK assay fluorescence over time at varying RNA input concentrations. Background-subtracted fluorescence at 1 h is shown in Fig. 2e. NTC, non-template control; Center = mean and error bars = s.d. for 3 technical replicates. Note: error bars for NTC are present but small. Source data are provided as a Source Data file.

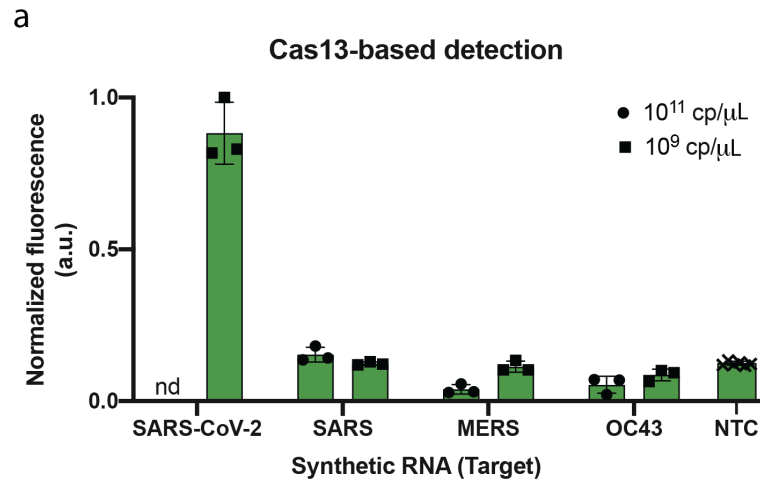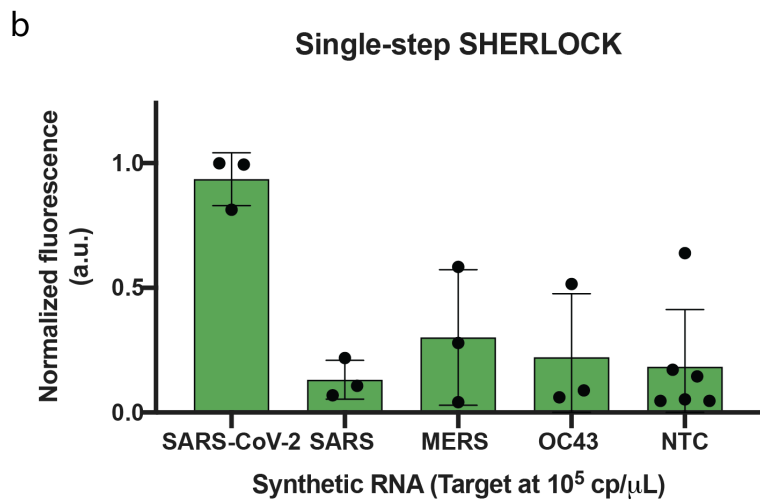

**Supplementary Fig. 5. Single-step SHERLOCK specificity.**

**a** Normalized fluorescence of Cas13-based detection using synthetic RNA targets of four human-infecting coronaviruses as the target input after 3 h. nd, not done. n = 3 replicates. **b** Normalized fluorescence of optimized single-step SHERLOCK using synthetic RNA targets of four human-infecting coronaviruses as target input after 3 h. NTC, non-template control; n = 3 replicates. error bars, s.d. for 3-6 technical replicates. For **(a and b)**, Center = mean and error bars = s.d. for 3 technical replicates. Source data are provided as a Source Data file.

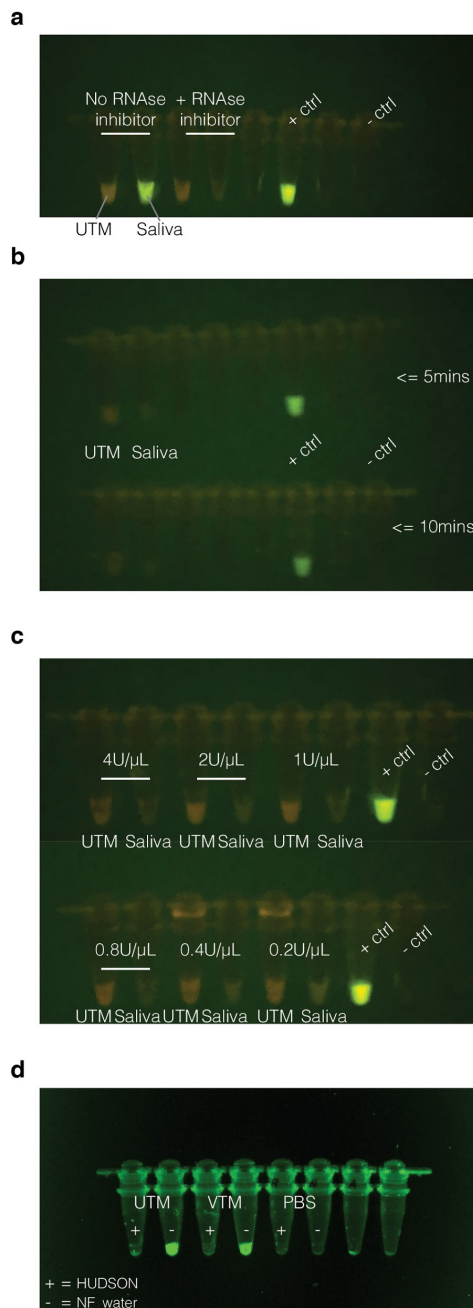

**Supplementary Fig. 6. HUDSON optimization experiments.**

**a** Samples were treated with 100 mM TCEP and 1 mM EDTA and subjected to a 20 min heating step at 50 °C. RNase inhibitor, 4 U/μL, unless otherwise specified. **b** Samples were treated with 100 mM TCEP, 1mM EDTA, and 4 U/μL RNase inhibitor. **c** Samples were treated with 100 mM TCEP and 1 mM EDTA and subjected to a 5 min heating step at 50 °C. **d** Samples in UTM, VTm, or PBS were treated with 100 mM TCEP and 1 mM EDTA or nuclease-free water and subjected to a 5 min heating step at 50 °C. For **a-d**, positive and negative controls undergo no treatment. RNaseAlert (final concentration: 200 nM) was added immediately after the heating step and is used to measure the RNase activity.

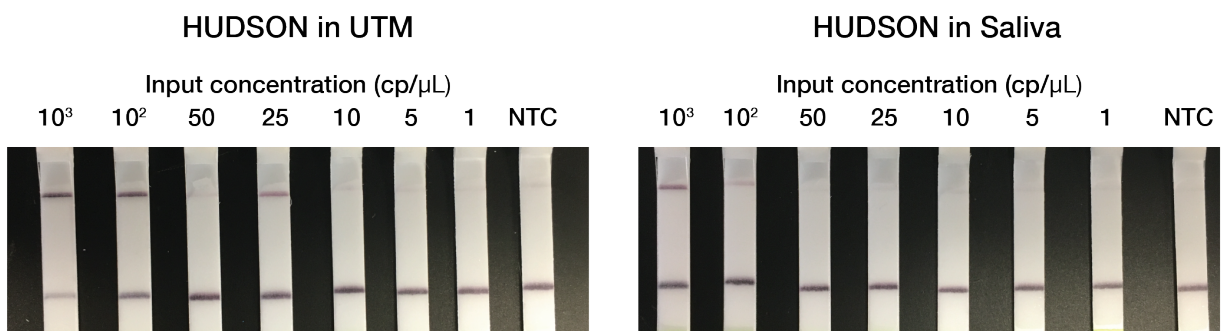

**Supplementary Fig. 7. SHINE for UTM and saliva with colorimetric detection.**

SHINE with colorimetric readout using synthetic RNA template spiked into UTM (left) and saliva (right) after the initial HUDSON heating step.



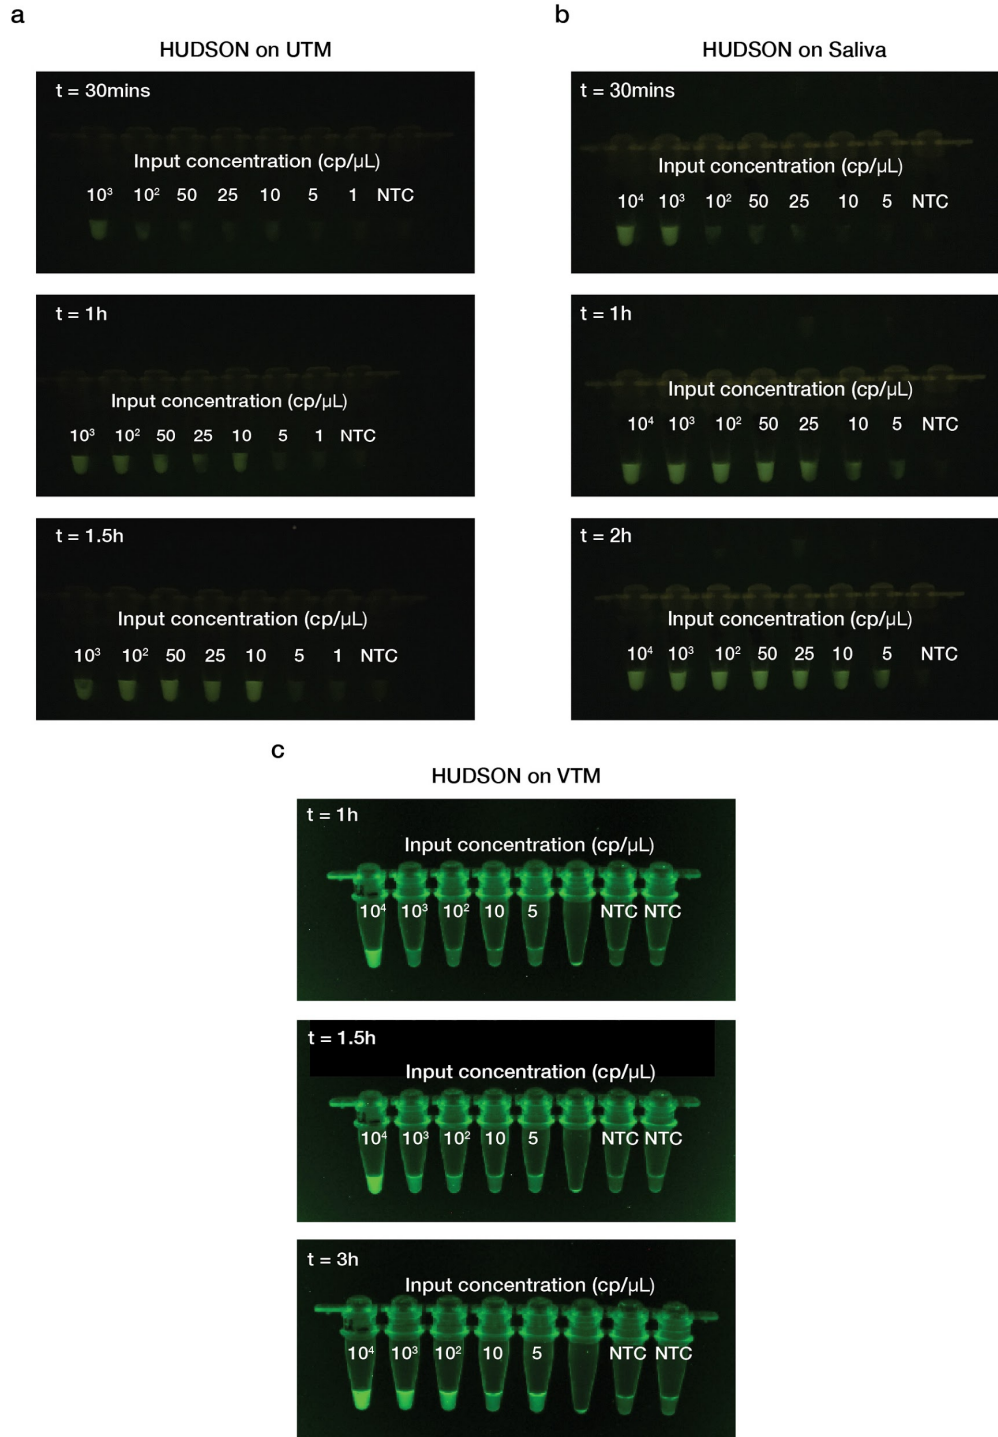

**Supplementary Fig. 8. SHINE for UTM, VTM, and saliva with in-tube fluorescent detection.** **a-c** SHINE with in-tube readout using synthetic RNA template spiked into UTM (**a**), saliva (**b**) and VTM (**c**) after the initial HUDSON heating step. Transilluminator or GelDoc images were captured using a smartphone camera. NTC, non-template control.

a

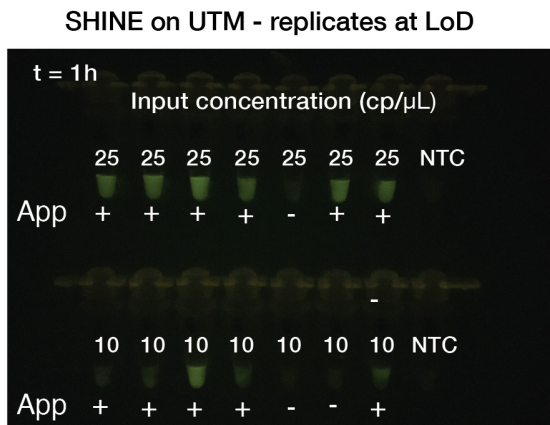

b

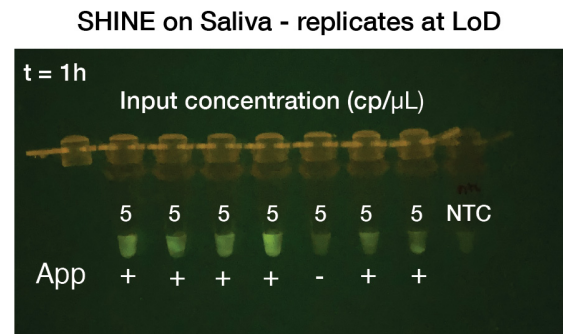

**Supplementary Fig. 9. Limits of detection of SHINE on UTM and saliva.**

**a-b** SHINE with in-tube readout using synthetic RNA template spiked into UTM (**a**) and saliva (**b**) after the initial HUDSON heating step. Transilluminator images were captured using a smartphone camera and analyzed by the companion smartphone application (App).

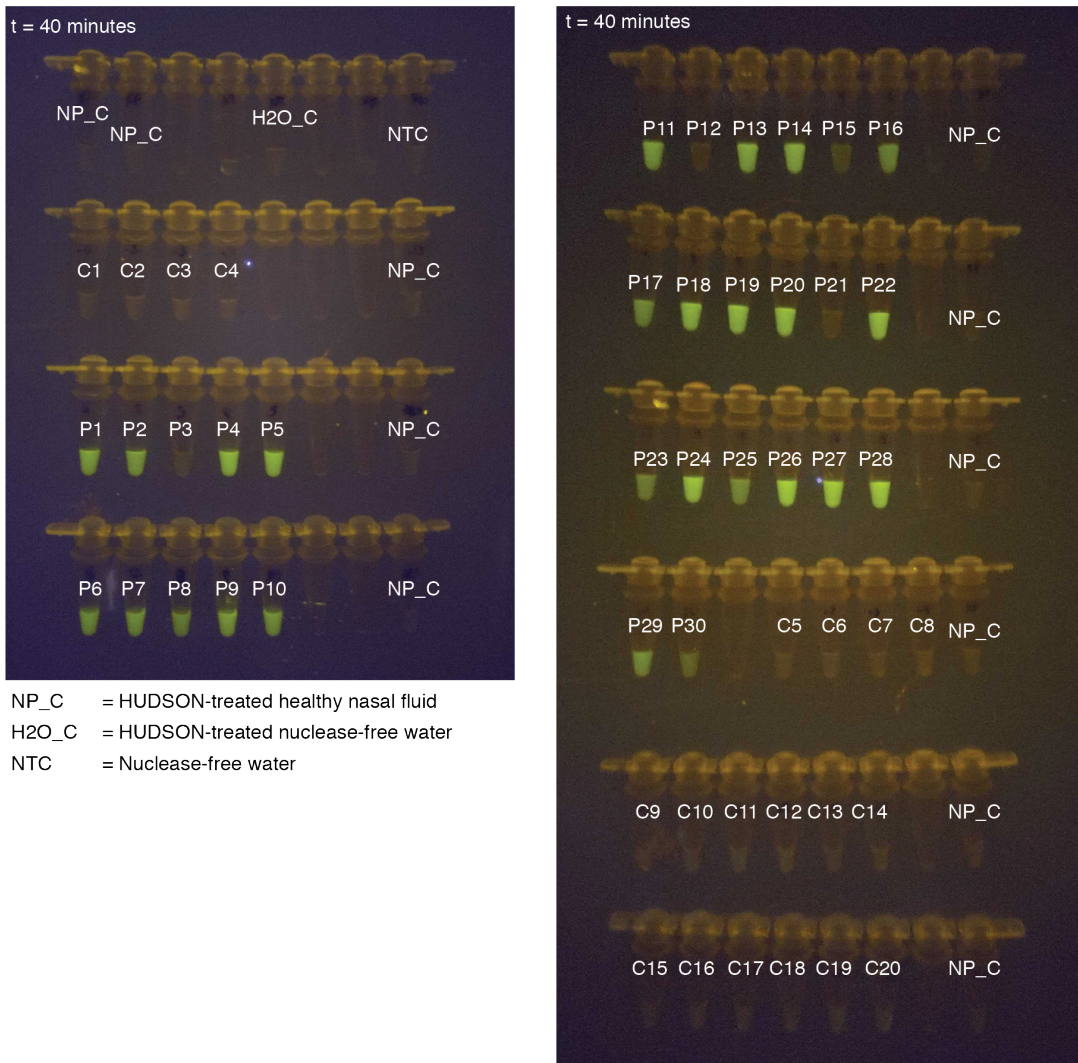

**Supplementary Fig. 10. SHINE on unextracted patient samples.**

NP swabs in UTM were used as input into the SHINE assay. Transilluminator images were captured using a smartphone camera after 40 min of single-step SHERLOCK incubation.

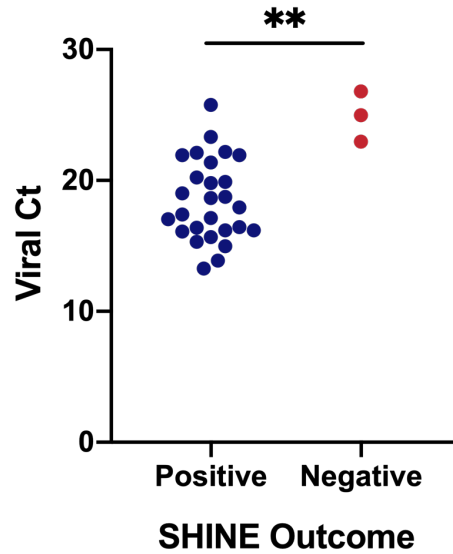

**Supplementary Fig. 11. SHINE’s ability to detect viral RNA is significantly associated with the RT-qPCR threshold cycle.**

Viral Ct values measured by SARS-CoV-2 RT-qPCR of extracted RNA from 30 patient NP samples grouped by the result of the SHINE assay. The association between viral Ct and SHINE outcome was assessed using a one-sided Wilcoxon rank sum test. \*\*,  $p = 0.0017$ . Source data are provided as a Source Data file.

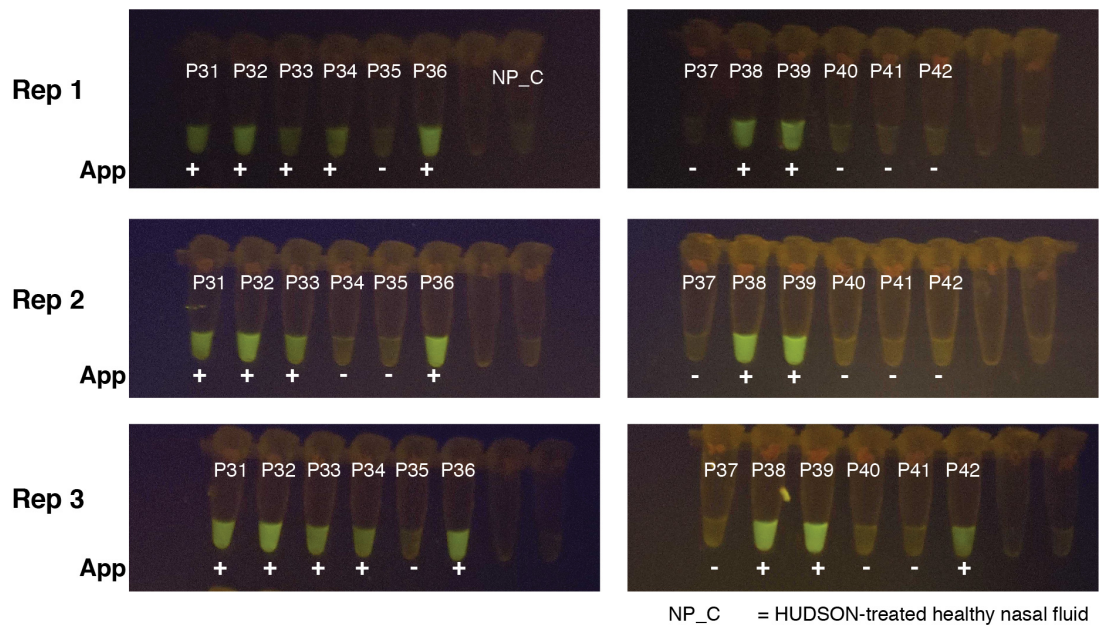

**Supplementary Fig. 12. SHINE on unextracted patient samples.**

NP swabs in VTM were used as input into the SHINE assay. Transilluminator images were captured using a smartphone camera after 40 min of single-step SHERLOCK incubation. Samples were tested in triplicate. Rep, replicate. App, readout with smartphone application.

| <b>Sample name</b> | <b>Sample ID</b> | <b>Sample type</b> | <b>Viral Ct</b> | <b>Viral quantity (cp/μL)</b> | <b>Figures</b> |
|--------------------|------------------|--------------------|-----------------|-------------------------------|----------------|
| E1                 | ON507            | S & NP in VTM      | 12.94           | -                             | S1d            |
| E2                 | KW326            | S & NP in VTM      | 19.81           | -                             | S1d            |
| E3                 | KW298            | S & NP in VTM      | 17.63           | -                             | S1d            |
| E4                 | KW151            | NP in VTM          | 29.06           | -                             | S1d            |
| E5                 | EK220            | NP in VTM          | 19.75           | -                             | S1d            |
| E6                 | OS555            | S & NP in VTM      | 19.70           | -                             | S1d            |
| E7                 | EK272            | NP in VTM          | 31.43           | -                             | S1d            |
| E8                 | EK271            | NP in VTM          | 33.01           | -                             | S1d            |
| E9                 | EK239            | NP in VTM          | 38.67           | -                             | S1d            |
| E10                | EK219            | NP in VTM          | 37.77           | -                             | S1d            |
| E11                | EK204            | NP in VTM          | 37.87           | -                             | S1d            |
| E12                | KW311            | S & NP in VTM      | 30.18           | -                             | S1d            |
| E13                | OY213            | NP in VTM          | 31.73           | -                             | S1d            |
| E14                | OS533            | S & NP in VTM      | 36.33           | -                             | S1d            |
| E15                | ON444            | S & NP in VTM      | 38.56           | -                             | S1d            |
| E16                | ON356            | S & NP in VTM      | 32.36           | -                             | S1d            |
| E17                | ON1010           | S & NP in VTM      | 15.11           | -                             | S1d            |
| E18                | ON969            | S & NP in VTM      | 18.19           | -                             | S1d            |
| E19                | ON752            | S & NP in VTM      | 20.46           | -                             | S1d            |

|     |        |               |       |   |     |
|-----|--------|---------------|-------|---|-----|
| E20 | ON964  | S & NP in VTM | 20.43 | - | S1d |
| E21 | ON997  | NP in VTM     | 21.21 | - | S1d |
| E22 | ON802  | S & NP in VTM | 22.23 | - | S1d |
| E23 | ON915  | NP in VTM     | 23.81 | - | S1d |
| E24 | ON829  | S & NP in VTM | 24.17 | - | S1d |
| E25 | ON718  | S & NP in VTM | 25.52 | - | S1d |
| E26 | ON686  | S & NP in VTM | 26.55 | - | S1d |
| E27 | ON848  | S & NP in VTM | 27.89 | - | S1d |
| E28 | ON1012 | S & NP in VTM | 28.91 | - | S1d |
| E29 | ON1014 | S & NP in VTM | 29.4  | - | S1d |
| E30 | ON900  | S & NP in VTM | 30.55 | - | S1d |
| E31 | ON700  | S & NP in VTM | 31.27 | - | S1d |
| E32 | ON973  | NP in VTM     | 32.71 | - | S1d |
| E33 | OS597  | S & NP in VTM | 33.05 | - | S1d |
| E34 | OS634  | S & NP in VTM | 34.03 | - | S1d |
| E35 | OY358  | NP in VTM     | 35.42 | - | S1d |
| E36 | OY396  | NP in VTM     | 36.12 | - | S1d |
| E37 | OY351  | NP in VTM     | 37.25 | - | S1d |
| E38 | OY349  | NP in VTM     | 38.58 | - | S1d |
| E39 | OY975  | S & NP in VTM | 39.05 | - | S1d |

|     |              |           |        |             |       |
|-----|--------------|-----------|--------|-------------|-------|
| E40 | ON646        | NP in VTM | 40.6   | -           | S1d   |
| E41 | ON986        | NP in VTM | 41.33  | -           | S1d   |
| E42 | MA_MGH_00155 | NP in UTM | 25.989 | 892.22      | 2g, h |
| E43 | MA_MGH_00156 | NP in UTM | 17.753 | 85,470.64   | 2g, h |
| E44 | MA_MGH_00157 | NP in UTM | 17.235 | 113,800.532 | 2g, h |
| E45 | MA_MGH_00159 | NP in UTM | 20.861 | 15,298.96   | 2g, h |
| E46 | MA_MGH_00160 | NP in UTM | 20.006 | 24,515.988  | 2g, h |
| E47 | MA_MGH_00166 | NP in UTM | 25.548 | 1,136.696   | 2g, h |
| P1  | MA_MGH_00441 | NP in UTM | 22.109 | 52787.064   | 3g, h |
| P2  | MA_MGH_00442 | NP in UTM | 25.764 | 4386.186    | 3g, h |
| P3  | MA_MGH_00443 | NP in UTM | 26.809 | 2154.246    | 3g, h |
| P4  | MA_MGH_00445 | NP in UTM | 16.429 | 3390658.2   | 3g, h |
| P5  | MA_MGH_00446 | NP in UTM | 17.136 | 2022960.6   | 3g, h |
| P6  | MA_MGH_00447 | NP in UTM | 16.39  | 3426433.56  | 3g, h |
| P7  | MA_MGH_00453 | NP in UTM | 21.935 | 68312.187   | 3g, h |
| P8  | MA_MGH_00454 | NP in UTM | 21.936 | 68293.593   | 3g, h |
| P9  | MA_MGH_00456 | NP in UTM | 15.678 | 5660253.54  | 3g, h |
| P10 | MA_MGH_00458 | NP in UTM | 23.331 | 25530.948   | 3g, h |
| P11 | MA_MGH_00459 | NP in UTM | 15.313 | 7329902.04  | 3g, h |
| P12 | MA_MGH_00460 | NP in UTM | 24.979 | 7977.141    | 3g, h |
| P13 | MA_MGH_00461 | NP in UTM | 16.2   | 3914305.92  | 3g, h |
| P14 | MA_MGH_00463 | NP in UTM | 17.05  | 2157841.26  | 3g, h |
| P15 | MA_MGH_00464 | NP in UTM | 20.234 | 227657.529  | 3g, h |
| P16 | MA_MGH_00465 | NP in UTM | 16.102 | 4201061.4   | 3g, h |
| P17 | MA_MGH_00466 | NP in UTM | 17.933 | 1151605.125 | 3g, h |
| P18 | MA_MGH_00467 | NP in UTM | 19.023 | 541607.094  | 3g, h |
| P19 | MA_MGH_00468 | NP in UTM | 18.661 | 689269.86   | 3g, h |



|     |              |           |        |            |          |
|-----|--------------|-----------|--------|------------|----------|
| P20 | MA_MGH_00469 | NP in UTM | 14.983 | 9240984    | 3g, h    |
| P21 | MA_MGH_00471 | NP in UTM | 22.963 | 33130.494  | 3g, h    |
| P22 | MA_MGH_00472 | NP in UTM | 13.271 | 30975183   | 3g, h    |
| P23 | MA_MGH_00473 | NP in UTM | 18.757 | 645122.16  | 3f, g, h |
| P24 | MA_MGH_00474 | NP in UTM | 17.397 | 1682047.8  | 3f, g, h |
| P25 | MA_MGH_00475 | NP in UTM | 19.896 | 289419.75  | 3f, g, h |
| P26 | MA_MGH_00476 | NP in UTM | 16.181 | 3970140.3  | 3f, g, h |
| P27 | MA_MGH_00477 | NP in UTM | 19.812 | 305659.512 | 3f, g, h |
| P28 | MA_MGH_00479 | NP in UTM | 13.868 | 20324826   | 3f, g, h |
| P29 | MA_MGH_00480 | NP in UTM | 21.362 | 102417.507 | 3g, h    |
| P30 | MA_MGH_00481 | NP in UTM | 22.187 | 57196.188  | 3g, h    |
| P31 | BocaBio_58   | NP in VTM | 26.778 | 378.502    | S12      |
| P32 | BocaBio_59   | NP in VTM | 23.752 | 3107.53    | S12      |
| P33 | BocaBio_61   | NP in VTM | 27.356 | 253.299    | S12      |
| P34 | BocaBio_66   | NP in VTM | 25.549 | 605.047    | S12      |
| P35 | BocaBio_67   | NP in VTM | 30.27  | 20.938     | S12      |
| P36 | BocaBio_69   | NP in VTM | 22.577 | 5073.833   | S12      |
| P37 | BocaBio_70   | NP in VTM | 31.299 | 9.99       | S12      |
| P38 | BocaBio_73   | NP in VTM | 19.235 | 55318.152  | S12      |
| P39 | BocaBio_78   | NP in VTM | 16.798 | 316178.75  | S12      |
| P40 | BocaBio_80   | NP in VTM | 32.006 | 6.924      | S12      |
| P41 | BocaBio_82   | NP in VTM | 28.433 | 77.379     | S12      |
| P42 | BocaBio_83   | NP in VTM | 26.303 | 353.353    | S12      |

**Supplementary Table 1: Patient sample information.**

For samples E42-E47 and P1-P30, the viral quantity listed below is adjusted as sample was diluted 1:3 for input into in-house RT-qPCR assay. For sample type “S & NP in VTM”, saliva and nasal specimens were combined during nucleic acid extraction. NP, nasopharyngeal swab; S, saliva; UTM, universal viral transport medium; VTM, viral transport medium.

| <b>Sample name</b> | <b>Sample ID</b> | <b>Sample type</b> | <b>Viral Ct</b> | <b>Viral quantity (cp/μL)</b> | <b>Figures</b> |
|--------------------|------------------|--------------------|-----------------|-------------------------------|----------------|
| C1                 | EK276            | NP in VTM          | -               | -                             | S1d            |
| C2                 | OY314            | NP in VTM          | -               | -                             | S1d            |
| C3                 | OS572            | S & NP in VTM      | -               | -                             | S1d            |
| C4                 | ON513            | S & NP in VTM      | -               | -                             | S1d            |
| C5                 | ON1179           | S & NP in VTM      | -               | -                             | S1d            |
| C6                 | ON1180           | S & NP in VTM      | -               | -                             | S1d            |
| C7                 | ON1181           | S & NP in VTM      | -               | -                             | S1d            |
| C8                 | ON1182           | S & NP in VTM      | -               | -                             | S1d            |
| C9                 | ON1183           | S & NP in VTM      | -               | -                             | S1d            |
| C10                | MA_MGH_004<br>11 | NP in UTM          | -               | -                             | 3g, h          |
| C11                | MA_MGH_004<br>12 | NP in UTM          | -               | -                             | 3g, h          |
| C12                | MA_MGH_004<br>13 | NP in UTM          | -               | -                             | 3g, h          |
| C13                | MA_MGH_004<br>14 | NP in UTM          | -               | -                             | 3g, h          |
| C14                | MA_MGH_003<br>20 | NP in UTM          | -               | -                             | 3f, g, h       |
| C15                | MA_MGH_003<br>21 | NP in UTM          | -               | -                             | 3f, g, h       |
| C16                | MA_MGH_003<br>22 | NP in UTM          | -               | -                             | 3f, g, h       |
| C17                | MA_MGH_003<br>23 | NP in UTM          | -               | -                             | 3f, g, h       |

|     |                  |           |   |   |       |
|-----|------------------|-----------|---|---|-------|
| C18 | MA_MGH_003<br>24 | NP in UTM | - | - | 3g, h |
| C19 | MA_MGH_003<br>25 | NP in UTM | - | - | 3g, h |
| C20 | MA_MGH_003<br>26 | NP in UTM | - | - | 3g, h |
| C21 | MA_MGH_003<br>27 | NP in UTM | - | - | 3g, h |
| C22 | MA_MGH_003<br>28 | NP in UTM | - | - | 3g, h |
| C23 | MA_MGH_003<br>29 | NP in UTM | - | - | 3g, h |
| C24 | MA_MGH_003<br>38 | NP in UTM | - | - | 3g, h |
| C25 | MA_MGH_003<br>53 | NP in UTM | - | - | 3g, h |
| C26 | MA_MGH_003<br>54 | NP in UTM | - | - | 3g, h |
| C27 | MA_MGH_003<br>55 | NP in UTM | - | - | 3g, h |
| C28 | MA_MGH_003<br>56 | NP in UTM | - | - | 3g, h |
| C29 | MA_MGH_003<br>57 | NP in UTM | - | - | 3g, h |

**Supplementary Table 2: COVID-19 negative patient sample information.**

C1-C9 samples were collected from symptomatic, suspected COVID-19-positive patients but tested negative for SARS-CoV-2 RNA by RT-qPCR. C10-C29 samples were collected prior to the start of the coronavirus pandemic, and therefore are assumed not to contain SARS-CoV-2 RNA. NP, nasopharyngeal swab; S, saliva; UTM, universal viral transport medium.

| Reagent                                          | Reaction                    | Source                       | Stock Concentration | Notes                               |
|--------------------------------------------------|-----------------------------|------------------------------|---------------------|-------------------------------------|
| EDTA                                             | HUDSON                      | Thermo Fisher Scientific™    | 0.5 M               |                                     |
| TCEP-HCl                                         | HUDSON                      | Thermo Fisher Scientific™    | 0.5 M               |                                     |
| Universal Viral Transport Medium (UTM)           | HUDSON                      | BD                           | N/A                 |                                     |
| Saliva, Pooled Human Donors                      | HUDSON                      | Lee Biosolutions, Inc.       | N/A                 |                                     |
| RNase Inhibitor                                  | HUDSON;<br>RPA;<br>SHERLOCK | NEB®                         | 40 U/μL             | Murine                              |
| HiScribe™ T7 High Yield RNA Synthesis Kit        | IVT                         | NEB®                         | N/A                 |                                     |
| RNAClean XP                                      | IVT                         | Beckman Coulter, Inc.        | N/A                 |                                     |
| RNase-Free DNase I                               | IVT                         | QIAGEN                       |                     |                                     |
| T7 Promoter ssDNA Primer                         | IVT                         | Integrated DNA Technologies™ |                     | Supplementary Table 4 for sequences |
| Ambion® Linear Acrylamide                        | PCR                         | Thermo Fisher Scientific™    | 5 mg/mL             |                                     |
| AMPure XP                                        | PCR                         | Beckman Coulter, Inc.        | N/A                 |                                     |
| Inter-amplicon Primer                            | PCR                         | Integrated DNA Technologies™ | 5 μM                | Supplementary Table 4 for sequences |
| MagMAX™ <i>mirVana</i> ™ Total RNA Isolation Kit | PCR                         | Thermo Fisher Scientific™    | N/A                 |                                     |
| PCR Primers (forward, reverse)                   | PCR                         | Integrated DNA Technologies™ |                     | Supplementary Table 4 for sequences |
| Power SYBR® Green Master Mix                     | PCR                         | Thermo Fisher Scientific™    | N/A                 |                                     |
| TaqPath™ 1-Step RT-qPCR Master Mix               | PCR                         | Thermo Fisher Scientific™    | 4×                  |                                     |

|                                         |               |                              |                            |                                                          |
|-----------------------------------------|---------------|------------------------------|----------------------------|----------------------------------------------------------|
| TURBO™ DNase                            | PCR           | Thermo Fisher Scientific™    | 2 U/μL                     |                                                          |
| Magnesium Acetate (MgOAc)               | RPA           | TwistDx™                     | 280 mM                     | TwistAmp® Basic Kit                                      |
| RevertAid Reverse Transcriptase         | RPA           | Thermo Fisher Scientific™    | 200 U/μL                   |                                                          |
| RNase H                                 | RPA           | NEB®                         | 5 U/μL                     |                                                          |
| RPA Pellets (lyophilized)               | RPA           | TwistDx™                     | N/A                        | TwistAmp® Basic Kit                                      |
| RPA Primers (forward, reverse)          | RPA           | Integrated DNA Technologies™ | 5 μM of each primer        | Supplementary Table 4 for sequences                      |
| SuperScript IV Reverse Transcriptase    | RPA           | Thermo Fisher Scientific™    | 200 U/μL                   | Invitrogen                                               |
| Synthetic DNA Target                    | RPA           | Integrated DNA Technologies™ | 10 <sup>10</sup> copies/μL | Supplementary Table 4 for sequences                      |
| Synthetic RNA Target                    | RPA           | N/A                          | 10 <sup>10</sup> copies/μL | generated via IVT of synthetic DNA target                |
| Nuclease-free Water                     | RPA; SHERLOCK | Thermo Fisher Scientific™    | N/A                        | Invitrogen                                               |
| Reaction Buffer (Optimized)             | RPA; SHERLOCK | N/A                          | 5×                         | 0.1 M HEPES pH 8.0, 300 mM KCl, 25% PEG-8000             |
| Reaction Buffer (Original)              | RPA; SHERLOCK | N/A                          | 5×                         | 0.1 M HEPES pH 6.8, 300 mM NaCl, 25% PEG-8000, 25 μM DTT |
| Cas13a crRNA                            | SHERLOCK      | Integrated DNA Technologies™ | 2 μM                       | Supplementary Table 4 for sequences                      |
| Cleavage Buffer (CB)                    | SHERLOCK      | N/A                          | 10×                        | 400 mM Tris pH 7.5, 10 mM DTT                            |
| FAM Cleavage Reporter (Biotinylated)    | SHERLOCK      | Integrated DNA Technologies™ | 16 μM                      | Supplementary Table 4 for sequences                      |
| polyU FAM Cleavage Reporter (Quencher)  | SHERLOCK      | Integrated DNA Technologies™ | 2 μM                       | Supplementary Table 4 for sequences                      |
| LwaCas13a protein                       | SHERLOCK      | GenScript®                   | 0.5 mg/mL                  | Custom protein purification as described previously (23) |
| Magnesium Chloride (MgCl <sub>2</sub> ) | SHERLOCK      | Thermo Fisher Scientific™    | 1 M                        | Invitrogen                                               |

|                                                                 |             |                           |                          |                                                       |
|-----------------------------------------------------------------|-------------|---------------------------|--------------------------|-------------------------------------------------------|
| HybriDetect Assay Buffer                                        | SHERLOCK    | Milenia® Biotec           | N/A                      |                                                       |
| HybriDetect 1 Lateral Flow Strips                               | SHERLOCK    | Milenia® Biotec           | N/A                      |                                                       |
| RNaseAlert® Substrate v2                                        | SHERLOCK    | Thermo Fisher Scientific™ | 2 µM                     |                                                       |
| rNTPs                                                           | SHERLOCK    | NEB®                      | 25 mM of each nucleotide |                                                       |
| Storage Buffer (SB)                                             | SHERLOCK    | N/A                       | 1×                       | 50 mM Tris pH 7.5, 600 mM NaCl, 5% glycerol, 2 mM DTT |
| T7 RNA Polymerase                                               | SHERLOCK    | Lucigen®                  | 50 U/µL                  | NextGen®                                              |
| Vero (CCL-81™)                                                  | VIRAL STOCK | ATCC®                     | N/A                      | Grivet kidney epithelial cells                        |
| Dulbecco's Modified Eagle Medium (DMEM), high glucose, pyruvate | VIRAL STOCK | Thermo Fisher Scientific™ | N/A                      | Gibco®                                                |
| Fetal Bovine Serum (FBS)                                        | VIRAL STOCK | SAFC Biosciences, Inc.    | N/A                      |                                                       |
| Vero C1008 (CRL-1586™)                                          | VIRAL STOCK | ATCC®                     | N/A                      | Grivet kidney epithelial cells                        |
| Avicel® PH-101                                                  | VIRAL STOCK | MilliporeSigma            | N/A                      |                                                       |
| Crystal Violet                                                  | VIRAL STOCK | MilliporeSigma            | N/A                      |                                                       |

**Supplementary Table 3: Reagents used in either the optimized single-step assay or in the optimization process.**

HUDSON = Heating Unextracted Diagnostic Samples to Obliterate Nucleases. IVT = *In-vitro* Transcription. PCR = Polymerase Chain Reaction. RPA = Recombinase Polymerase Amplification. SHERLOCK = Specific High Sensitivity Enzymatic Reporter Unlocking.

| Reagent                   | Sequence                                                                                                                                                                                                                                                                                                                                                                                                                                                                                                                                  | SARS-CoV-2 Gene Location |
|---------------------------|-------------------------------------------------------------------------------------------------------------------------------------------------------------------------------------------------------------------------------------------------------------------------------------------------------------------------------------------------------------------------------------------------------------------------------------------------------------------------------------------------------------------------------------------|--------------------------|
| Cas13a crRNA              | CUCUUCUUCAGGUUGAAGAGCAGCAGAA                                                                                                                                                                                                                                                                                                                                                                                                                                                                                                              | Orf1ab                   |
| PCR Primer (forward)      | GACCCCAAATCAGCGAAAT                                                                                                                                                                                                                                                                                                                                                                                                                                                                                                                       | N1                       |
| PCR Primer (reverse)      | TCTGGTACTGCCAGTTGAATCTG                                                                                                                                                                                                                                                                                                                                                                                                                                                                                                                   | N1                       |
| PCR Probe                 | /FAM/ACCCCGCATTACGTTTGGTGGACC/BHQ1                                                                                                                                                                                                                                                                                                                                                                                                                                                                                                        |                          |
| RPA Primer (forward)      | CCAAGGTAAACCTTTGGAATTTGGTGCCAC                                                                                                                                                                                                                                                                                                                                                                                                                                                                                                            | Orf1ab                   |
| RPA Primer (reverse)      | ACTATCATCATCTAACCAATCTTCTTCTTG                                                                                                                                                                                                                                                                                                                                                                                                                                                                                                            | Orf1ab                   |
| Synthetic MERS DNA Target | GCACCATGCTATTGCTTTAACGCTGAGGGTGATGCATC<br>TTGGTCTTCTACTATGATCTTCTCTTTCACCCCGTCGA<br>GTGTGACGAGGAGTGTTCTGAAGTAGAGGCTTCAGATT<br>TAGAAGAAGGTGAATCAGAGTGCATTTCTGAGACTTCAA<br>CTGAACAAGTTGACGTTTCTCATGAGGTTTCTGACGACG<br>AGTGGGCTGCTGCAGTTGATGAAGCGTTCCCCCTCGAT<br>GAAGCAGAAGATGTTACTGAATCTGTGCAAGAAGAAGC<br>ACAACCAGTAGAAGTACCTGTTGAAGATATTGCGCAGG<br>TTGTCATAGCTGACACCTTACAGGAACTCCTGTTGTGT<br>CTGATACTGTTGAAGTCCCACCGCAAGTGGTGAAACTT<br>CCGTCTGAACCTCAGACTATCCAGCCCGAGGTAAAAGA<br>AGTTGCACCTGTCTATGAGGCTGATACCGAACAGACAC<br>AGAGTGTTACTGTTA |                          |
| Synthetic OC43 DNA Target | ATATGGAGGAATTTTATGCTGTGGTGATTGATGCCATAG<br>AAGAGAACTTTCTCCATGTAAGGAGCTTGAAGGTGTA<br>GGTGCTAAAGTTAGTGCCTTTTACAGAAATTAGAGGAT<br>AATCCCCTATTTTTATTTGATGAGGCTGGCGAAGAAGTT<br>TTTGCTCCTAAATTGTATTGTGCCTTTACAGCTCCTGAA<br>GATGATGACTTTCTTGAGGAAAGTGATGTTGAAGAAGAT<br>GATGTAGAAGGTGAGGAACTGATTTAACTATCACAAGT<br>GCTGGACAGCCTTGTGTTGCTAGTGAACAGGAGGAATC<br>TTCTGAAGTCTTAGAGGACACTTTGGATGATGGTCCAAG<br>TGTGGAGACATCTGATTCACAAGTTGAAGAAGATGTAGA<br>AATGTCGGATTTTGTGATCTTGAATCTGTGATTCAGGA<br>TTATGAAAATGTTTGTGTTTGTGATTTTATACTACAGAGCCA<br>GAATTTGT |                          |

|                                                         |                                                                                                                                                                                                                                                                                                                                                                                                                                                                                                                                            |                                   |
|---------------------------------------------------------|--------------------------------------------------------------------------------------------------------------------------------------------------------------------------------------------------------------------------------------------------------------------------------------------------------------------------------------------------------------------------------------------------------------------------------------------------------------------------------------------------------------------------------------------|-----------------------------------|
| Synthetic SARS DNA Target                               | GAATGTGAGAATCACATTTGAGCTTGATGAACGTGTTGA<br>CAAAGTGCTTAATGAAAAGTGCTCTGTCTACACTGTTGA<br>ATCCGGTACCGAAGTTACTGAGTTTGCATGTGTTGTAGC<br>AGAGGCTGTTGTGAAGACTTTACAACCAGTTTCTGATCT<br>CCTTACCAACATGGGTATTGATCTTGATGAGTGGAGTGT<br>AGCTACATTCTACTTATTTGATGATGCTGGTGAAGAAAA<br>CTTTTCATCACGTATGTATTGTTCTTTTACCCTCCAGAT<br>GAGGAAGAAGAGGACGATGCAGAGTGTGAGGAAGAAG<br>AAATTGATGAAACCTGTGAACATGAGTACGGTACAGAG<br>GATGATTATCAAGGTCTCCCTCTGGAATTTGGTGCCTCA<br>GCTGAAACAGTTCGAGTTGAGGAAGAAGAAGAGGAAGA<br>CTGGCTGGATGATACTACTGAGCAATCAGAGATTGAGC<br>CAGAACCAGAA |                                   |
| Synthetic SARS-CoV-2 DNA Target                         | GTGAGTTTAAATTGGCTTCACATATGTATTGTTCTTTCTA<br>CCCTCCAGATGAGGATGAAGAAGAAGGTGATTGTGAAG<br>AAGAAGAGTTTGAGCCATCAACTCAATATGAGTATGGTA<br>CTGAAGATGATTACCAAGGTAAACCTTTGGAATTTGGTG<br>CCACTTCTGCTGCTCTTCAACCTGAAGAAGAGCAAGAA<br>GAAGATTGGTTAGATGATGATAGTCAACAACTGTTGGT<br>CAACAAGACGGCAGTGAGGACAATCAGACAACACTACTAT<br>TCAAACAATTGTTGAGGTTCAACCTCAATTAGAGATGGA<br>ACTTACACCAGTTGTTTCAGACTATTGAAGTGAATAGTTT<br>TAGTGGTTATTTAAACTTACTGACAATGTATACATTA<br>AATGCAGACATTGTGGAAGAAGCTAAAAAGGTAAACC<br>AACAGTGGTTGTTAATGCAGCCAATGTTTACCTTAAACA<br>TGGAGGAGG  | Orf1ab                            |
| T7 Promoter ssDNA Primer                                | GAAATTAATACGACTCACTATAGGG                                                                                                                                                                                                                                                                                                                                                                                                                                                                                                                  | dsDNA appended upstream of target |
| FAM Cleavage Reporter (Biotinylated)                    | /56-FAM/rUrUrUrUrUrUrUrUrUrUrUrU/3Bio/                                                                                                                                                                                                                                                                                                                                                                                                                                                                                                     |                                   |
| polyU (i.e., 6U or 7U) FAM Cleavage Reporter (Quencher) | /56-FAM/rUrUrUrUrUrU(rU)/3IABkFQ/                                                                                                                                                                                                                                                                                                                                                                                                                                                                                                          |                                   |

**Supplementary Table 4: Oligonucleotides used in this study.**

MERS = Middle East Respiratory Syndrome. OC43 = Human coronavirus OC43. SARS = Severe Acute Respiratory Syndrome.



**Supplementary Procedure:** Experimental design for in-tube fluorescent readout of  $N$  clinical samples with 20  $\mu\text{L}$  reaction volumes.

**A. Nuclease inactivation and viral particle lysis**

1. Mix  $2.28 * N \mu\text{L}$  TCEP-HCl (0.5 M) with  $0.023 * N \mu\text{L}$  EDTA (0.5 M) at room temperature.
2. Add 8.8  $\mu\text{L}$  of each sample [e.g., nasopharyngeal swab in universal viral transport medium (UTM) or saliva] to a strip tube. Add 2  $\mu\text{L}$  TCEP/EDTA mixture and 0.2  $\mu\text{L}$  RNase inhibitor (40 U/ $\mu\text{L}$ ) to each sample.
3. Incubate samples for 5 minutes at 40 °C, followed by 5 minutes at 70 °C (if UTM) or 5 minutes at 95 °C (if saliva).

**B. Viral RNA amplification and detection**

For  $N$  samples with 20  $\mu\text{L}$  reaction volumes and a 6.5% pipetting loss, the reaction factor  $M$  is  $N/5$ , rounded up to the nearest integer.

| Reagent                                                                                                | Amount ( $\mu\text{L}$ ) |
|--------------------------------------------------------------------------------------------------------|--------------------------|
| RPA Pellets                                                                                            | $1 * M$                  |
| Reaction Buffer: 0.1 M HEPES pH 8.0, 300 mM KCl, 25% PEG-8000 (Optimized) (5X)                         | $21.50 * M$              |
| Cas13a resuspended in SB (50 mM Tris pH 7.5, 600 mM NaCl, 5% glycerol, 2 mM DTT) (2.26 $\mu\text{M}$ ) | $2.14 * M$               |
| 6U FAM Reporter (2 $\mu\text{M}$ )                                                                     | $3.19 * M$               |
| RNase Inhibitor (40 U/ $\mu\text{L}$ )                                                                 | $2.69 * M$               |
| rNTPs (25 mM each nucleotide)                                                                          | $8.60 * M$               |
| SuperScript IV Reverse Transcriptase (200 U/ $\mu\text{L}$ )                                           | $1.08 * M$               |
| RNase H (5 U/ $\mu\text{L}$ )                                                                          | $2.15 * M$               |
| T7 RNA Polymerase (50 U/ $\mu\text{L}$ )                                                               | $2.15 * M$               |
| Nuclease-free H <sub>2</sub> O                                                                         | $50.60 * M$              |
| RPA Primers (5 $\mu\text{M}$ each primer)                                                              | $2.45 * M$               |
| Cas13a crRNA (2 $\mu\text{M}$ )                                                                        | $0.46 * M$               |
| Magnesium Acetate (280 $\mu\text{M}$ )                                                                 | $5.1 * M$                |

1. Make a master mix of all components listed above, except the RPA pellets and the magnesium acetate. Keep the master mix on ice.

2. Resuspend the RPA pellets with 65  $\mu\text{L}$  of the master mix each, returning the resuspended material to the master mix and mixing well.
3. Add magnesium acetate to the reaction mixture.
4. Aliquot 19  $\mu\text{L}$  master mix into wells of a strip tube that is pre-chilled on ice. Add 1  $\mu\text{L}$  of sample (*i.e.*, HUDSON product) or negative control (*e.g.*, nuclease-free water) to each aliquot, mixing thoroughly.
5. Incubate samples at 37  $^{\circ}\text{C}$  for 30 to 90 minutes.
6. Download the companion smartphone application, which is available at <https://github.com/sameeds/sherlock-reader-app>. Follow instructions in the application to upload a picture of the results. The application will return binary outcomes (*i.e.*, whether each sample is positive or negative relative to the negative control).
