# Supplementary material for: Streamlined inactivation, amplification, and Cas13-based detection of SARS-CoV-2
Source: PubMed Central journal article supplement (PMC7680145; doi:10.1038/s41467-020-19097-x), 2020-11-20
Supplement: 41467_2020_19097_MOESM5_ESM.pdf [file 41467_2020_19097_MOESM5_ESM.pdf]

**Title:** Supplementary Data 1

**Description:** Detailed reaction conditions for optimization experiments.
